# Supplementary material for: A Medicaid Quality Improvement Collaborative on Psychotropic Medication Prescribing for Children
Source: Atypon-hosted journal article supplement (doi:10.1176/appi.ps.201700547), 2018-03-01
Supplement: appi.ps.201700547.ds001.pdf [file appi.ps.201700547.ds001.pdf]

**Demographic and clinical characteristics of study participants**

| <b>Characteristic</b>              | <b>Group 1<br/>N = 8,222</b> | <b>Group 2<br/>N = 3,412</b> | <b>State<br/>N=143,057</b>  | <b>p-value<sup>1</sup></b> |
|------------------------------------|------------------------------|------------------------------|-----------------------------|----------------------------|
| Age                                | Mean = 11.26<br>(SD = 3.89)  | Mean = 10.60<br>(SD = 3.80)  | Mean = 11.28<br>(SD = 3.91) | ns                         |
| Gender (Male)                      | 59.20%                       | 67.20%                       | 61.40%                      | <.0001                     |
| Race/Ethnicity                     |                              |                              |                             | <.0001                     |
| Caucasian                          | 75.10%                       | 67.50%                       | 74.20%                      |                            |
| African American                   | 20.40%                       | 27.30%                       | 21.40%                      |                            |
| Other <sup>2</sup>                 | 4.52%                        | 5.19%                        | 4.47%                       |                            |
| Eligibility                        |                              |                              |                             | <.0001                     |
| Low Income                         | 80.70%                       | 76.10%                       | 84.10%                      |                            |
| Disabled                           | 16.00%                       | 18.90%                       | 14.50%                      |                            |
| Foster                             | 3.27%                        | 5.10%                        | 1.36%                       |                            |
| Primary Diagnosis                  |                              |                              |                             | <.0001                     |
| Attention Deficit<br>Hyperactivity | 33.70%                       | 39.80%                       | 44.40%                      |                            |
| Adjustment                         | 7.47%                        | 6.25%                        | 6.05%                       |                            |
| Autism                             | 3.13%                        | 3.49%                        | 1.69%                       |                            |
| Bipolar                            | 8.52%                        | 10.30%                       | 5.18%                       |                            |
| Anxiety                            | 5.44%                        | 3.52%                        | 4.26%                       |                            |
| Conduct/Oppositional Defiant       | 4.03%                        | 8.72%                        | 3.89%                       |                            |
| Depression                         | 11.00%                       | 8.01%                        | 7.53%                       |                            |
| Schizophrenia/Psychosis            | 2.67%                        | 5.17%                        | 3.01%                       |                            |
| Substance                          | 0.84%                        | 0.41%                        | 0.38%                       |                            |
| Intellectual Disability            | 0.93%                        | 0.76%                        | 1.08%                       |                            |
| Psychiatric Comorbidities          |                              |                              |                             | <.0001                     |
| 1                                  | 34.10%                       | 35.10%                       | 43.90%                      |                            |
| 2 or more                          | 55.20%                       | 61.40%                       | 40.60%                      |                            |
| Any Medical Comorbidities          | 23.70%                       | 14.80%                       | 16.60%                      | <.0001                     |

<sup>1</sup>Based on one-way ANOVA for age and Pearson Chi-Square with Bonferroni correction for all remaining characteristics

<sup>2</sup>Asian, Pacific Islander, Hispanic, American Indian, Mutually Defined

### Change in prevalence of prescribing measures

| Comparison Groups                                                     | Baseline Prevalence Rate (95% CI) | Follow-up Prevalence Rate (95% CI) | Rate Difference (95% CI) | % Δ   | p-value |
|-----------------------------------------------------------------------|-----------------------------------|------------------------------------|--------------------------|-------|---------|
| <b>Measure 1: AP Use Among Children Two through Five Years of Age</b> |                                   |                                    |                          |       |         |
| State (n=9,649)                                                       | 13.06 (12.55 – 13.57)             | 11.58 (11.09 – 12.08)              | -1.47 (-2.33 - -0.61)    | -11.2 | 0.0017  |
| Group 1(n=646)                                                        | 9.83 (8.00 – 11.67)               | 9.88 (8.02 – 11.74)                | 0.05 (-3.11 – 3.20)      | 0.5   | 0.9283  |
| Group 22 (n=277)                                                      | 11.50 (7.64 – 15.37)              | 5.85 (3.48 – 8.21)                 | -5.65 (-11.0 - -0.35)    | -49.1 | 0.0155  |
| <b>Measure 2: AP Polypharmacy</b>                                     |                                   |                                    |                          |       |         |
| State (n=27,521)                                                      | 6.14 (5.95 – 6.32)                | 5.98 (5.79 – 6.46)                 | -0.16 (-0.47 – 0.15)     | -2.6  | 0.4295  |
| Wave 1 (n=2,130)                                                      | 4.74 (4.09 – 5.39)                | 3.60 (3.07 – 4.13)                 | -1.13 (-2.14 - -0.12)    | -23.8 | 0.0455  |
| Wave 2 (n=1,170)                                                      | 13.94 (12.37 – 15.51)             | 9.78 (8.59 – 10.98)                | -4.15 (-6.49 - -1.82)    | -29.8 | 0.0017  |
| <b>Measure 3: Psychotropic Polypharmacy</b>                           |                                   |                                    |                          |       |         |
| State (n=143,057)                                                     | 3.38 (3.32 – 3.44)                | 3.21 (3.15 – 3.26)                 | -0.17 (-0.27 - -0.08)    | -5.0  | 0.0108  |
| Wave 1 (n=8,222)                                                      | 4.51 (4.23 – 4.79)                | 4.27 (4.01 – 4.53)                 | -0.24 (-0.71 – 0.22)     | -5.3  | 0.4473  |
| Wave 2 (n=3,412)                                                      | 7.74 (7.11 – 8.38)                | 6.31 (5.80 – 6.83)                 | -1.43 (-2.40 - -0.46)    | -18.5 | 0.0203  |
